# Supplementary material for: Plasma proteomic changes during therapeutic hypothermia in resuscitated patients after cardiac arrest
Source: PubMed Central journal article supplement — Exp Ther Med. 2019 Jun 4;18(2):1069–80. doi: 10.3892/etm.2019.7649 (PMC6601400; doi:10.3892/etm.2019.7649), 2019-06-04
Supplement: Supplementary_Data.pdf [file Supplementary_Data.pdf]

Table SI. Patient characteristics.

| Characteristic                                                     | Patient no.                 |                                                       |                                      |                    |                                                                                                                                       |                                                       |                                                  |                                              |                        |
|--------------------------------------------------------------------|-----------------------------|-------------------------------------------------------|--------------------------------------|--------------------|---------------------------------------------------------------------------------------------------------------------------------------|-------------------------------------------------------|--------------------------------------------------|----------------------------------------------|------------------------|
|                                                                    | 1                           | 2                                                     | 3                                    | 4                  | 5                                                                                                                                     | 6                                                     | 7                                                | 8                                            | 9                      |
| Hospital                                                           | S.U.H                       | S.U.H                                                 | S.P.H                                | S.P.H              | S.P.H                                                                                                                                 | S.U.H                                                 | S.P.H                                            | S.P.H                                        | S.P.H                  |
| Age                                                                | 78                          | 78                                                    | 91                                   | 46                 | 65                                                                                                                                    | 62                                                    | 86                                               | 75                                           | 76                     |
| Sex                                                                | Female                      | Female                                                | Male                                 | Female             | Female                                                                                                                                | Male                                                  | Male                                             | Male                                         | Female                 |
| Cause of CPA                                                       | Asphyxia (in hospital)      | Hanging                                               | Asphyxia                             | Metabolic acidosis | Hanging (in hospital)                                                                                                                 | Anaphylactic shock                                    | Asphyxia                                         | Asphyxia                                     | Asphyxia               |
| Comorbidities                                                      | Spinal canal stenosis       | Hypertension, diabetes mellitus, psychiatric disorder | Dementia, hyperuricemia              | Epilepsy           | Postoperative state of ovarian cancer, Anxiety disorder, past history of myocardial infarction and percutaneous coronary intervention | Cancer of unknown primary origin, atrial fibrillation | Postoperative state of prostate cancer, dementia | Hemiplegia, schizophrania, diabetes mellitus | Dementia, hypertension |
| Medications                                                        | Prostaglandin E1 derivative | SU agent, DPP-4 inhibitor, predonine, aspirin         | Allopurinol, donepezil hydrochloride | None               | beta-blocker, ARB, statin, aspirin, nicorandil                                                                                        | Dabigatran etexilate, $\beta$ -blocker                | None                                             | Ca blocker, ARB, antiplatelet drug           | Ca blocker,            |
| Bystander-initiated BLS                                            | None                        | None                                                  | Done                                 | Done               | None                                                                                                                                  | Done                                                  | Risperidone                                      | Done                                         | None                   |
| Time between collapse to CPR, min                                  | 7                           | 10                                                    | 0                                    | 0                  | 8                                                                                                                                     | 0                                                     | 6                                                | 10                                           | 10                     |
| Initial rhythm                                                     | PEA                         | N.A.                                                  | PEA                                  | PEA                | PEA                                                                                                                                   | PEA                                                   | PEA                                              | Asystole                                     | N.A.                   |
| Time between collapse to ROSC, min                                 | 29                          | 12                                                    | 15                                   | 11                 | 15                                                                                                                                    | 20                                                    | 8                                                | 16                                           | 20                     |
| Time between collapse to start of cooling, min                     | 222                         | 153                                                   | 130                                  | 26                 | 246                                                                                                                                   | 157                                                   | 113                                              | 125                                          | 266                    |
| Time between initiation of cooling to target temperature 34°C, min | 28                          | 20                                                    | 40                                   | 0                  | 74                                                                                                                                    | 28                                                    | 10                                               | 70                                           | 44                     |
| Time between initiation of rewarming to target temperature 36°C, h | 25.2                        | 25.3                                                  | 22.5                                 | 26.1               | 23.1                                                                                                                                  | 46.5                                                  | 23.7                                             | 20                                           | 25.8                   |
| APACHE II score                                                    | 29                          | 35                                                    | 33                                   | 39                 | 26                                                                                                                                    | 28                                                    | 26                                               | 29                                           | 36                     |
| SAPS II                                                            | 62                          | 58                                                    | 73                                   | 82                 | 68                                                                                                                                    | 75                                                    | 72                                               | 76                                           | 68                     |
| Initial blood gas analysis, FiO <sub>2</sub>                       | 0.3                         | 0.5                                                   | N.A.                                 | 1                  | N.A.                                                                                                                                  | 0.45                                                  | N.A.                                             | N.A.                                         | N.A.                   |
| pH                                                                 | 7.36                        | 7.409                                                 | 6.88                                 | 6.482              | N.A.                                                                                                                                  | 7.287                                                 | 7.14                                             | 7.354                                        | 7.11                   |

Table SI. Continued.

| Characteristic                         | Patient no. |       |       |       |       |       |       |       |       |
|----------------------------------------|-------------|-------|-------|-------|-------|-------|-------|-------|-------|
|                                        | 1           | 2     | 3     | 4     | 5     | 6     | 7     | 8     | 9     |
| pH                                     | 7.36        | 7.409 | 6.88  | 6.482 | N.A.  | 7.287 | 7.14  | 7.354 | 7.11  |
| PaO <sub>2</sub> , mmHg                | 88.7        | 241   | 117   | 285   | N.A.  | 172   | 96.8  | 166   | 41.1  |
| PaCO <sub>2</sub> , mmHg               | 44.4        | 35.1  | 98.1  | 45    | N.A.  | 31.5  | 63.2  | 30.5  | 73.4  |
| HCO <sub>3</sub> <sup>-</sup> , mmol/l | 24.5        | 11.7  | 20.6  | 3.2   | N.A.  | 14.5  | 20.6  | 16.6  | 22.6  |
| Hemoglobin, g/dl                       | 9.3         | 11.7  | 11.2  | 8.8   | N.A.  | 10.4  | 13    | 14.2  | 10    |
| Lactate, mmol/l                        | 29          | 28    | 8.2   | 24    | N.A.  | 59    | 3.7   | 6.9   | 7     |
| Blood transfusion                      | None        | None  | None  | Done  | None  | Done  | None  | None  | None  |
| Outcome                                | CPC 4       | dead  | CPC 3 | CPC 1 | CPC 4 | CPC 1 | CPC 1 | CPC 3 | CPC 3 |

CPA, cardiopulmonary arrest; S.U.H, Shimane University Hospital; S.P.H, Shimane Prefectural Central Hospital; ARB, angiotensin II receptor blocker; BLS, basic life support; CPR, cardiopulmonary resuscitation; ROSC, return of spontaneous circulation; SAPS, simplified acute physiology score; APACHE II, Acute Physiology and Chronic Health Evaluation II; CPC, cerebral performance category; PEA, pulseless electrical activity; N.A., not applicable.
